# Supplementary material for: Associations between Indoor Air Pollution and Acute Respiratory Infections among Under-Five Children in Afghanistan: Do SES and Sex Matter?
Source: Preprints.org preprint supplement (doi:10.20944/preprints201907.0250.v1), 2019-07-23
Supplement: Supplementary file 1 [file supplementary]

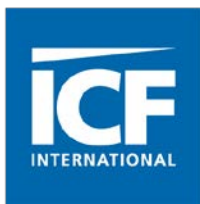

**Institutional Review Board Findings Form**  
**ICF IRB FWA00000845 (exp. 04/13/2019)**

**Project Director(s):** Sunita Kishor

**Project Title:** The Demographic and Health Survey (DHS) Program (DHS-7)

**ICF Project Number:** 132989.0.000

**Type of Review:**

☒ New      ☐ Modification      ☐ Annual review

**Findings of the Board:**

- ☒ Project complies with all of the requirements of 45 CFR 46, "Protection of Human Subjects"
- ☐ Project is exempt from IRB review (See IRB Exemption Form)
- ☐ Project does not comply with all of the requirements of 45 CFR 46

**Project Approved Until:** September 8, 2018

**Next Annual Review Date:** March 11, 2016

A handwritten signature in blue ink, appearing to be "J. Kishor", written over a horizontal line.

*Chair, Institutional Review Board*

March 11, 2015

*Date*

(Revised 07/18/2014)

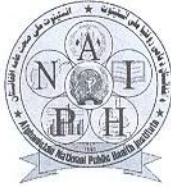

Islamic Republic of Afghanistan  
Ministry of Public Health  
Afghanistan National Public Health Institute  
Institutional Review Board

Date: 11/August /2015

جمهوری اسلامی افغانستان  
وزارت صحت عامه  
انستیتوت ملی صحت عامه افغانستان

د افغانستان اسلامي جمهوریت  
د عامې روغتیا وزارت  
د افغانستان د عامې روغتیا ملي انستیتوت

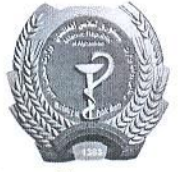

No. 361486

To: **Mohammad Sami Nabi**  
**Director of Field Operations**  
**Central Statistics Organization of Afghanistan**

**Subject:** Approval for proposal entitled, "Afghanistan Demographic and Health Survey 2015".

Dear Sir,

Institutional Review Board, Ministry of Public Health has examined and reviewed your proposal entitled, "Afghanistan Demographic and Health Survey 2015".

We are pleased to note satisfactory response therefore, your study is approved. However, we reserve the rights to monitor and audit your study and any violation of ethical norms during the course of study shall lead to withdrawal of given approval.

The duration of approval for a study to begin the research project is valid for six months and the exact date of research project implementation (start and end) should be informed to IRB secretary.

You are bound to share the result of your study with MoPH prior any dissemination plan.

Sincerely,

**Bashir Noormal** MD, MPH

*Director General*

*Afghanistan National Public Health Institute (ANPHI) &*

*Chairman, Institutional Review Board (IRB)*

*Ministry of Public Health*

Telephone No.: +93 (0) 20 29 22 435  
Email Address: [anphi@moph.gov.af](mailto:anphi@moph.gov.af)  
Website: [www.anphi.moph.gov.af](http://www.anphi.moph.gov.af)  
Postal Address: 3<sup>rd</sup> Floor of Main Building of Ministry of Public Health,  
Masoud Circle, Wazir Akbar Khan, Kabul-Afghanistan

+93 (0) 20 29 22 435  
[anphi@moph.gov.af](mailto:anphi@moph.gov.af)  
[www.anphi.moph.gov.af](http://www.anphi.moph.gov.af)  
منزل سوم تعمیر اصلی وزارت صحت عامه،  
حما، د اهر، مسعود، ۳م څار، اکبر خان، کابل-افغانستان

نمبر تېلېفون:  
آدرس الکترونیکی:  
صفحه انترنیتی:  
آدرس پستی:
